# Supplementary material
Source: PubMed Central journal article supplement (PMC30408)
Supplement: nar_29_3_644__1.pdf [file nar_29_3_644__1.pdf]

**SUPPLEMENTARY MATERIAL**

Putative function of *L.lactis* phage bIL285, bIL286, bIL309, bIL310, bIL311 and bIL312 proteins, deduced from amino acid sequence homology to known proteins. Organisms possessing homologous proteins are indicated. For phages, the bacterial host is indicated in parentheses by the following three-letter acronyms: *Bsu*, *B.subtilis*; *Eco*, *E.coli*; *Hin*, *Haemophilus influenzae*; *Lca*, *Lactobacillus casei*; *Lde*, *L.delbrueckii*; *Lga*, *Lactobacillus gasseri*; *Lla*, *L.lactis*; *Lmo*, *Listeria monocytogenes*; *Lpl*, *Lactobacillus plantarum*; *Mav*, *Mycobacterium avium*; *Msm*, *Mycobacterium smegmatis*; *Pae*, *Pseudomonas aeruginosa*; *Sau*, *S.aureus*; *Spn*, *Streptococcus pneumoniae*; *Spy*, *Streptococcus pyogenes*; *Sth*, *Streptococcus thermophilus*; *Vch*, *Vibrio cholerae*. Accession numbers are as follows: 105 (*Bsu*), AB016282; 186 (*Eco*), U32222; 29 (*Bsu*), M14782; 80 (*Eco*), A57258; 82 (*Eco*), X92588; A118 (*Lmo*), AJ242593; A2 (*Lca*), X97563; *adh* (*Lga*), Z97974; APSE-1 (endosymbiont), AF157835; B103 (*Bsu*), X99260; bIL170 (*Lla*), AF009630; bIL67 (*Lla*), L33769; BK5-T (*Lla*), L44593; *B.subtilis* ClpP, P80244; *B.subtilis* DnaI, P06567; *B.subtilis* SSB, P37455; c2 (*Lla*), L48605; C31 (*Streptomyces*), AJ006589;

Cp-1 (*Spn*), Z47794; CTX (*Vch*), AF055890; CTX (*Pae*), AB008550; D3 (*Pae*), AF147978; Dp-1 (*Spn*), Z93946; DT1 (*Sth*), AF085222; *E.coli* ClpP, J05534; *E.coli* DnaC, J04030; *E.coli* RusA, X92587; *flu* (*Hin*), L42023; *gle* (*Lpl*), X98106; HK022 (*Eco*), AF069308; HK97 (*Eco*), U18319; ICeSt1 (*Sth*), AJ243106; L5 (*Msm*), Z18946; LC3 (*Lla*), L10286; LL-H (*Lde*), L29568, L02496, L42315; *L.lactis* CspD, Y17217; O1205 (*Sth*), U88974; P1 (*Eco*), AF125376; P2 (*Eco*), AF063097; P22 (*Eco*), M12584; P4 (*Eco*), X51522; PBSX (*Bsu*), P23789; PVL (*Sau*), AB09866; PZA (*Bsu*), M11813; r1t (*Lla*), U38906; Rac (*Eco*), L23927; SalP1 (*Sau*), U93688; SF6 (*Bsu*), 67297X; Sfi11 (*Sth*), AF158600; Sfi19 (*Sth*), AF115102; Sfi21 (*Sth*), AF115103; sk1 (*Lla*), AF011378; SPBc2 (*Bsu*), AF020713; SPP1 (*Bsu*), X97918; T5 (*Eco*), AJ001191; T12 (*Spy*), U40453; T270 (*Spy*), U22342; TM4 (*Mav*), AF068845; Tn5252 (*Spn*), L29324; Tn5276 (*Lla*), L27649; TP901-1 (*Lla*), Y14232; TPJ-34 (*Sth*), AF020798; TPW22 (*Lla*), AF066865; Tuc2009 (*Lla*), AF109874, L26219, L31348, L31364, L31365, L31366.

| Functional assignment   | bIL285                                                                                                        | bIL286                                                                                                                                          | bIL309                                                                                                                      | bIL310                                                                                 | bIL311                        | bIL312                                                            |
|-------------------------|---------------------------------------------------------------------------------------------------------------|-------------------------------------------------------------------------------------------------------------------------------------------------|-----------------------------------------------------------------------------------------------------------------------------|----------------------------------------------------------------------------------------|-------------------------------|-------------------------------------------------------------------|
| Integrase               | BK5-T, LC3, r1t, Tuc2009 (Lla), many λ-like integrases                                                        | O1205, Sfi21 (Sth), T12, T270 (Spp), many λ-like integrases                                                                                     | BK5-T, LC3, r1t, Tuc2009, TPW22 (Lla) adh (Lga), many λ-like integrases                                                     | T12, T270, (Spp), Tn5276 (Lla), T12, T270, (Spp), Tn5276 (Lla), many λ-like integrases |                               | PVL (Sau), Tn5276 (Lla), adh (Lga)                                |
| Immunity repressor      | TP901-1 (Lla) O1205, Sfi21 (Sth) PVL (Sau)                                                                    | TP901-1, TPW22 (Lla) Sfi21, O1205 (Sth) PVL (Sau)                                                                                               | r1t, Tuc2009, BK5-T (Lla)                                                                                                   | TPW22, adh (Lga), gle (Lpl), PBSSX (Bsu), A118 (Lmo)                                   | Tuc2009, r1t (Lla), P22 (Eco) | TPW22, adh (Lga), gle (Lpl), PBSSX (Bsu), A118 (Lmo)              |
| Repressor               | TP901-1 (Lla), Sfi19, Sfi21, I205 (Sth), PVL (Sau), P22 (Eco)                                                 | A2 (Lca), Sfi21, TPI-34 (Sth)                                                                                                                   | r1t, TP901-1, BK5-T (Lla)                                                                                                   | TPW22 (Lla), TPI34 (Sth), PBSSX (Bsu), gle (Lpl), adh (Lga), CTX (Vch), A118 (Lmo)     |                               |                                                                   |
| Anti-repressor          | TP901-1 (Lla), adh (Lga), TPI34, Sfi21 (Sth), PVL (Sau), A118 (Lmo)                                           | TP901-1, TPW22 (Lla), TPI34, Sfi21 (Sth), PVL (Sau), A118 (Lmo)                                                                                 | TPI34, Sfi21 (Sth), PVL (Sau), flu (Him), A118 (Lmo), A2 (Lca), LLH (Lde), BK5-T, r1t (Lla)                                 | SPBc2 (Bsu), 80 (Eco)                                                                  |                               | Tn5252 (Spp), Tn5276 (Lla), ICeS11 (Sth)                          |
| Excisionase             |                                                                                                               |                                                                                                                                                 |                                                                                                                             |                                                                                        |                               |                                                                   |
| RecT                    |                                                                                                               |                                                                                                                                                 | Rac (Eco), SPP1 (Bsu), A118 (Lmo)                                                                                           |                                                                                        |                               |                                                                   |
| SSB                     | Tuc2009 (Lla), B.subtilis SSB, SPP1 (Bsu), PVL (Sau), P1 (Eco) PVL (Sau), SPP1 (Bsu), P1 (Eco)                | Tuc2009 (Lla), B.subtilis SSB, SPP1 (Bsu), P1 (Eco) PVL (Sau), SPP1 (Bsu), P1 (Eco)                                                             |                                                                                                                             |                                                                                        |                               |                                                                   |
| Replisome organizer     | Tuc2009, r1t (Lla), PVL (Sau), A118 (Lmo)                                                                     | Tuc2009, r1t (Lla), PVL (Sau), A118 (Lmo)                                                                                                       | Tuc2009, r1t (Lla), PVL (Sau), A118 (Lmo)                                                                                   | O1205, Sfi19, Sfi21, DT1 (Sth), C31 (Streptomyces), P4 (Eco)                           |                               | SalP1 (Sau), APSE-1 (endosymbiont)                                |
| Helicase                |                                                                                                               |                                                                                                                                                 |                                                                                                                             |                                                                                        |                               |                                                                   |
| DnaC                    |                                                                                                               | E.coli DnaC, r1t (Lla), O1205 (Sth), gle (Lpl), B.subtilis DnaI                                                                                 | E.coli DnaC, r1t (Lla), gle (Lpl)                                                                                           |                                                                                        |                               |                                                                   |
| RusA                    | r1t, Tuc2009 (Lla) E.coli RusA, 82 (Eco), TM4 (Mar)                                                           |                                                                                                                                                 |                                                                                                                             |                                                                                        |                               |                                                                   |
| dUTPase                 | r1t (Lla), SPBc2 (Bsu), PVL (Sau), T5 (Eco)                                                                   | r1t (Lla), SPBc2 (Bsu), PVL (Sau), T5 (Eco)                                                                                                     | r1t (Lla), SPBc2 (Bsu), PVL (Sau), T5 (Eco)                                                                                 |                                                                                        |                               |                                                                   |
| Terminase small subunit |                                                                                                               |                                                                                                                                                 |                                                                                                                             |                                                                                        |                               |                                                                   |
| Terminase large subunit | D3 (Pae), PVL (Sau), 105 (Bsu), A2 (Lca), Sfi19, Sfi21, DT1 (Sth), adh (Lga), HK97, HK022 (Eco), bIL170 (Lla) | A2 (Lca), PVL (Sau), 105 (Bsu), C31 (Streptomyces), bIL67, c2, sk1, bIL170 (Lla)                                                                | A2 (Lca), PVL (Sau), 105 (Bsu), C31 (Streptomyces), bIL67, c2, sk1, bIL170 (Lla)                                            | gle (Lpl), A118 (Lmo), LL-H (Lde), O1205, Sfi11 (Sth), SPP1, SFi6 (Bsu)                |                               |                                                                   |
| Portal protein          | HK97 (Eco)                                                                                                    | Sfi21 (Sth), PVL (Sau), 105 (Bsu)                                                                                                               | Sfi21 (Sth), PVL (Sau), 105 (Bsu), C31 (Streptomyces), HK97 (Eco)                                                           |                                                                                        |                               |                                                                   |
| Protease                | HK97 (Eco), C31 (Him), PVL (Sau), 105 (Bsu), A2 (Lca)                                                         | B.subtilis ClpP, E.coli ClpP, DT1, Sfi21 (Sth), D3 (Pae)                                                                                        | B.subtilis ClpP, E.coli ClpP, DT1, HK97 (Eco), C31 (Him), PVL (Sau), 105 (Bsu), A2 (Lca)                                    |                                                                                        |                               | A2 (Lca), C31 (Him), 105 (Bsu), PVL (Sau), HK97 (Eco)             |
| Capsid protein          | PVL (Sau), 105 (Bsu), BK5-T (Lla), Sfi21 (Sth)                                                                | BK5-T (Lla), Sfi21 (Sth), PVL (Sau), 105 (Bsu)                                                                                                  | PVL (Sau), 105 (Bsu), Sfi21 (Sth), BK5-T (Lla)                                                                              |                                                                                        |                               |                                                                   |
| Tail protein            | sk1, bIL170 (Lla), PVL (Sau), 105, SPP1 (Bsu)                                                                 | gle (Lpl), A2 (Lca) Sfi19, Sfi21, DT1 (Sth), LL-H (Lde), adh (Lga), gle (Lpl), sk1, bIL170 (Lla), PVL (Sau), A2 (Lca), CTX (Pae), 186, P2 (Eco) | Sfi19, Sfi21, DT1 (Sth), LL-H (Lde), adh (Lga), gle (Lpl), sk1, bIL170 (Lla), PVL (Sau), A2 (Lca), PBSSX, SPP1, SPBc2 (Bsu) |                                                                                        |                               |                                                                   |
| Endopeptidase           | 29, PZA, B103, SPBc2 (Bsu), gle (Lpl), PVL (Sau)                                                              |                                                                                                                                                 |                                                                                                                             |                                                                                        |                               |                                                                   |
| Tail host-specificity   |                                                                                                               | BK5-T (Lla), O1205, Sfi21 (Sth), bIL170, c2, bIL67 (Lla)                                                                                        | BK5-T (Lla), DT1, Sfi21, Sfi19, O1205, Sfi11 (Sth), c2, bIL170, r1t (Lla), A2 (Lca)                                         |                                                                                        |                               |                                                                   |
| Holin                   | BK5-T (Lla), PVL (Sau), SPP1, SPBc2 (Bsu)                                                                     | BK5-T (Lla), PVL (Sau), SPP1, SPBc2 (Bsu)                                                                                                       | BK5-T (Lla), PVL (Sau), SPP1, SPBc2 (Bsu)                                                                                   |                                                                                        |                               |                                                                   |
| Lysin                   | BK5-T (Lla), Dp-1 (Spm), 29, B103, PZA, PBSSX (Bsu)                                                           | BK5-T (Lla), Dp-1 (Spm), 29, B103, PZA, PBSSX (Bsu)                                                                                             | BK5-T (Lla), Dp-1 (Spm), 29, B103, PZA, PBSSX (Bsu)                                                                         |                                                                                        |                               |                                                                   |
| Cold-shock protein      |                                                                                                               |                                                                                                                                                 |                                                                                                                             |                                                                                        |                               |                                                                   |
| tRNA                    |                                                                                                               |                                                                                                                                                 |                                                                                                                             |                                                                                        | tRNA <sup>Lau</sup>           | L.lactis CspD, many bacterial Csp proteins<br>tRNA <sup>Met</sup> |
